# Supplementary material for: The Ultraviolet Irradiation of Keratinocytes Induces Ectopic Expression of LINE-1 Retrotransposon Machinery and Leads to Cellular Senescence
Source: MDPI journal article supplement (doi:10.3390/biomedicines11113017), 2023-11-10

Figure S1: Blots used for protein quantification using imageJ and Western blot images (Figure 4A).

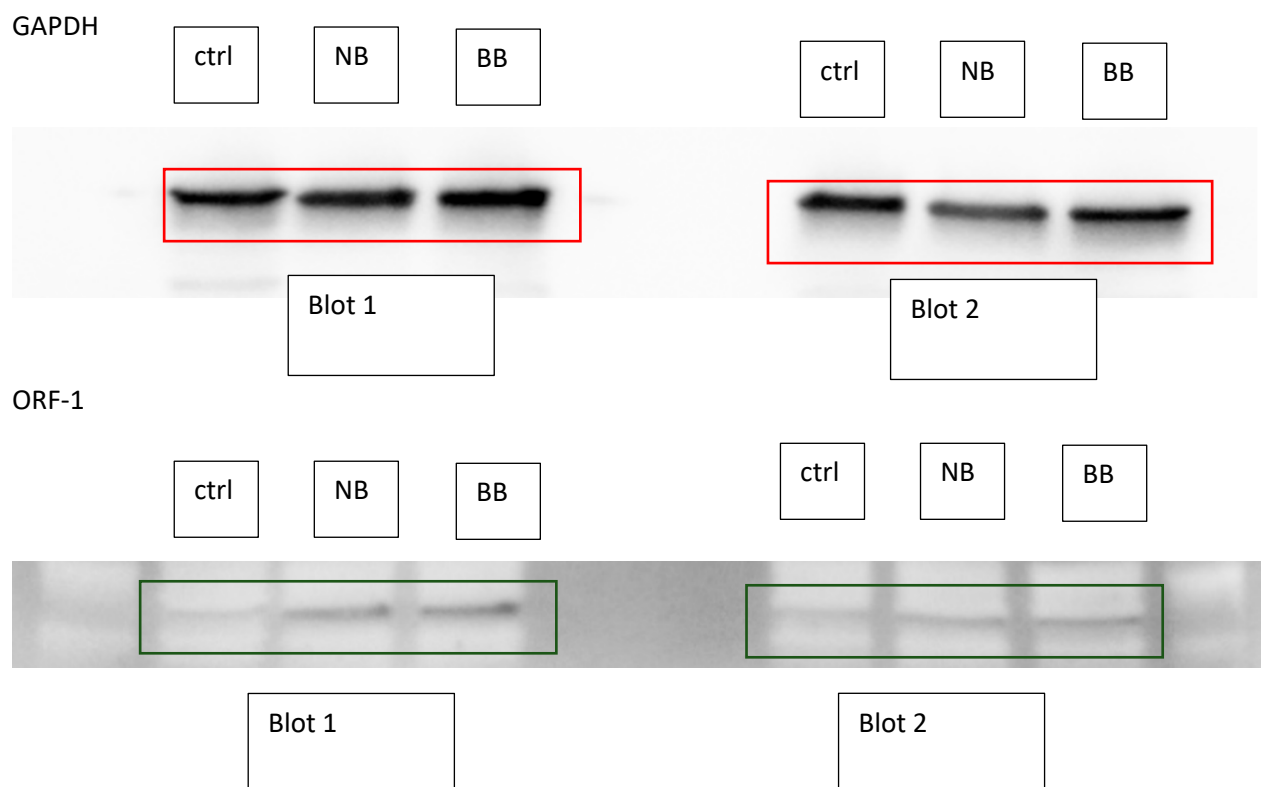

Figure S2: Additional blots used for protein quantification using imageJ.

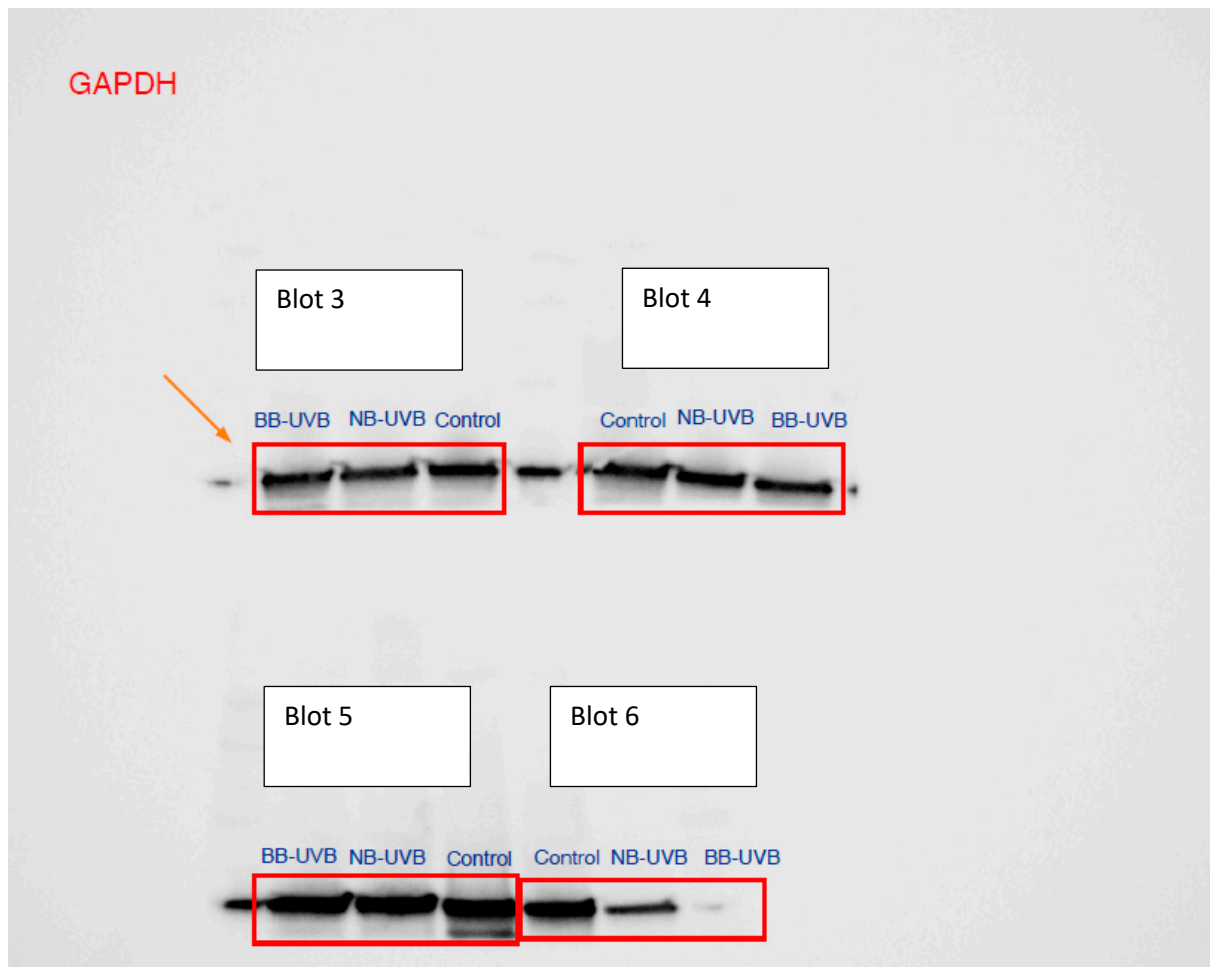

ORF1p

Blot 3

Blot 4

BB-UVB NB-UVB Control

Control

NB-UVB BB-UVB

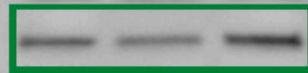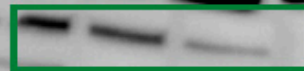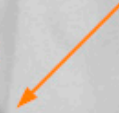

Blot 5

Blot 6

BB-UVB NB-UVB Control

Control

NB-UVB BB-UVB

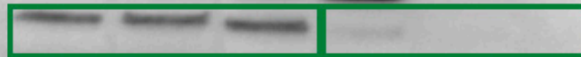

Supplement: s1 [file s1]
